# Supplementary material
Source: Springer Nature journal article supplement (https://www.springermedizin.de/resource/supplementary/12872_2013_609_MOESM1_ESM.pdf/9430346)

**a**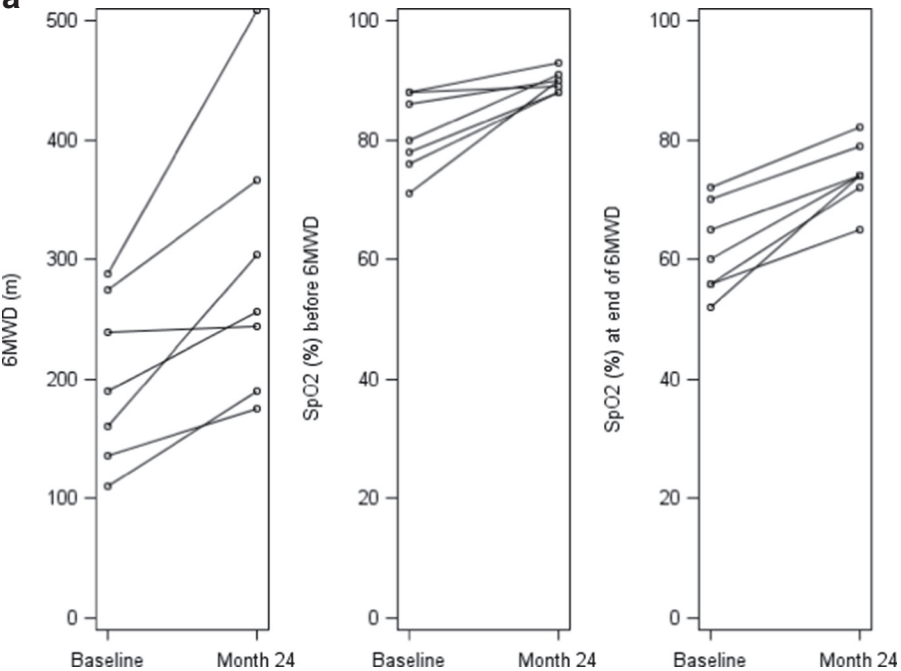**b**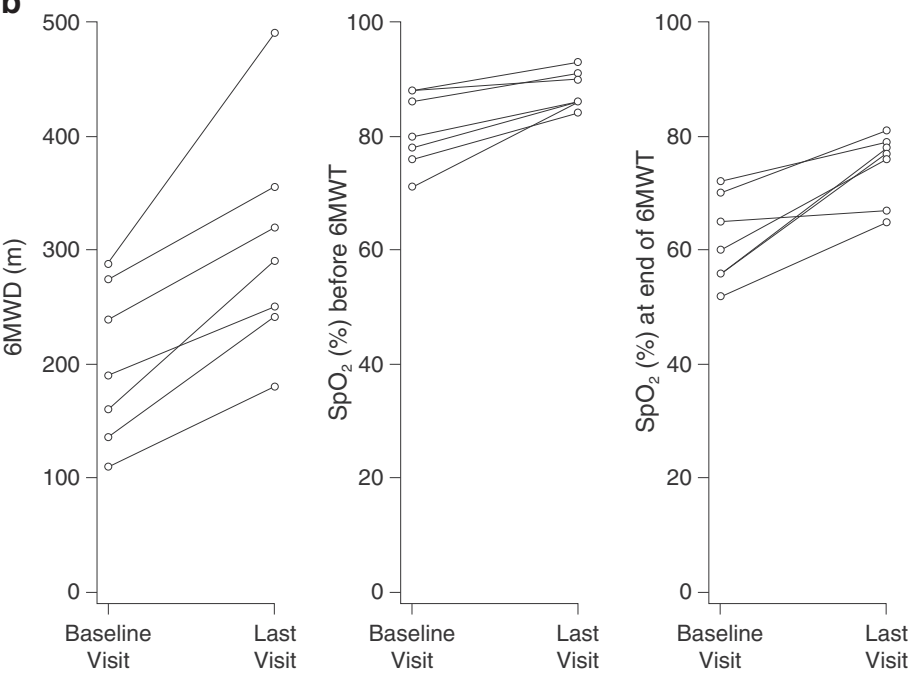

Supplement: MOESM1 [file 9430346]
